# Supplementary material for: Epidemiology of Anterior Cruciate Ligament Reconstruction Surgery in Italy: A 15-Year Nationwide Registry Study
Source: PubMed Central journal article supplement (PMC7826510; doi:10.3390/jcm10020223), 2021-01-10
Supplement: jcm-10-00223-s001.pdf [file jcm-10-00223-s001.pdf]

**Table S1.** Kind of data contained in the SDO registries of the Italian Ministry of Health regarding ACL injury and treatment.

| <b>Years</b>                    | <b>From 2001 to 2015</b>                                                                                                                                                                     |                                                      |
|---------------------------------|----------------------------------------------------------------------------------------------------------------------------------------------------------------------------------------------|------------------------------------------------------|
| Age                             | ≥ 15 years                                                                                                                                                                                   |                                                      |
| Sex                             | Male, Female                                                                                                                                                                                 |                                                      |
| Region of hospitalization       | Liguria, Lombardy, Piedmont, Aosta Valley, Emilia–Romagna, Friuli–Venezia Giulia, Trentino–South Tyrol, Veneto, Abruzzo, Basilicata, Calabria, Campania, Molise, Apulia, Sardinia and Sicily |                                                      |
| Macro-region of hospitalization | North, Center and South                                                                                                                                                                      |                                                      |
| Region of resident              | Liguria, Lombardy, Piedmont, Aosta Valley, Emilia–Romagna, Friuli–Venezia Giulia, Trentino–South Tyrol, Veneto, Abruzzo, Basilicata, Calabria, Campania, Molise, Apulia, Sardinia and Sicily |                                                      |
| Macro-region of resident        | North, Center and South                                                                                                                                                                      |                                                      |
| Time of hospitalization         | Days of hospitalization                                                                                                                                                                      |                                                      |
| Burden                          | Private, Public                                                                                                                                                                              |                                                      |
| Primary diagnosis code          | 717.83                                                                                                                                                                                       |                                                      |
| Main other diagnosis codes      | 717.2                                                                                                                                                                                        |                                                      |
|                                 | 717.3                                                                                                                                                                                        |                                                      |
|                                 | 717.40                                                                                                                                                                                       |                                                      |
|                                 | 717.43                                                                                                                                                                                       |                                                      |
|                                 | 717.49                                                                                                                                                                                       |                                                      |
| Primary procedure codes         | 81.43                                                                                                                                                                                        |                                                      |
|                                 | 81.45                                                                                                                                                                                        |                                                      |
| Main other procedure codes      | 80.6                                                                                                                                                                                         |                                                      |
|                                 | 78.45                                                                                                                                                                                        |                                                      |
|                                 | 80.26                                                                                                                                                                                        |                                                      |
|                                 | 83.41                                                                                                                                                                                        |                                                      |
|                                 | 89.52                                                                                                                                                                                        |                                                      |
| Diagnosis                       | 717.83                                                                                                                                                                                       | Old disruption of anterior cruciate ligament         |
|                                 | 717.2                                                                                                                                                                                        | Derangement of posterior horn of medial meniscus     |
|                                 | 717.3                                                                                                                                                                                        | Other and unspecified derangement of medial meniscus |
|                                 | 717.40                                                                                                                                                                                       | Derangement of lateral meniscus, unspecified         |
|                                 | 717.43                                                                                                                                                                                       | Derangement of posterior horn of lateral meniscus    |
|                                 | 717.49                                                                                                                                                                                       | Other derangement of lateral meniscus                |
| Procedure                       | 81.43                                                                                                                                                                                        | Triad Knee Repair                                    |
|                                 | 81.45                                                                                                                                                                                        | Other Repair of the cruciate ligaments               |
|                                 | 80.6                                                                                                                                                                                         | Excision of semilunar cartilage of knee              |
|                                 | 78.45                                                                                                                                                                                        | Other repair or plastic operations on bone, femur    |
|                                 | 80.26                                                                                                                                                                                        | Arthroscopy, knee                                    |
|                                 | 83.41                                                                                                                                                                                        | Excision of tendon for graft                         |
|                                 | 89.52                                                                                                                                                                                        | Electrocardiogram                                    |
